# Supplementary material for: Genomic, epigenomic, and transcriptomic signatures for telomerase complex components: a pan‐cancer analysis
Source: PubMed Central journal article supplement (PMC9812836; doi:10.1002/1878-0261.13324), 2022-10-31
Supplement: MOL2-17-150-s001.pdf [file MOL2-17-150-s001.pdf]

# **Genomic, epigenomic and transcriptomic signatures for telomerase complex components: a pan-cancer analysis.**

Jing Wang<sup>1</sup>, Mingkai Dai<sup>2</sup>, Xiangling Xing<sup>2</sup>, Xing Wang<sup>3</sup>, Xin Qin<sup>4</sup>, Zhiqing Fang<sup>4\*</sup>, Yidong Fan<sup>4\*</sup> and Dawei Xu<sup>2\*</sup>

## **Supplementary Information**

**Supplementary figure S1.** Telomerase score (TS) and distribution of the three TS subtypes in each cancer type.

**Supplementary figure S2.** Correlation between telomerase score (TS) and stemness in each cancer across 33 cancer types.

**Supplementary figure S3.** The correlation between telomerase score (TS) and proliferation marker KI67 level in each cancer type.

**Supplementary figure S4.** The correlation between telomerase score (TS) and EMT score in each type of cancer.

**Supplementary figure S5.** Positive correlation between gene copy numbers and expression in 10 telomerase components.

**Supplementary figure S6.** Mutational landscapes of 9 telomerase Components

FigureS1. Telomerase scores (TS) and distribution of the three TS subtypes in each cancer type

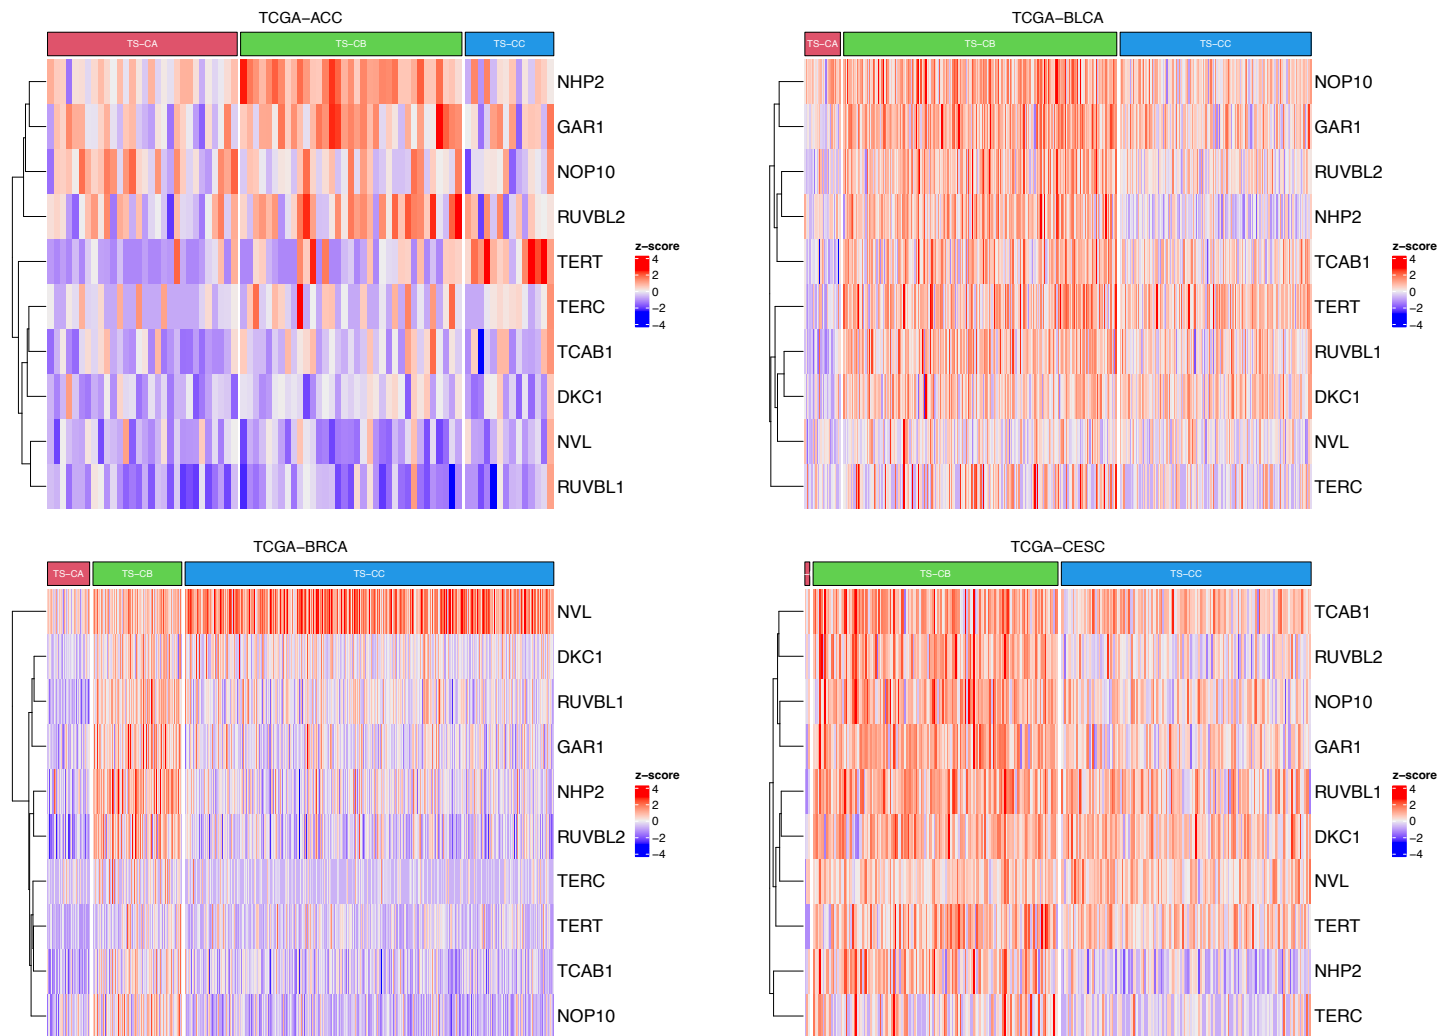

TCGA-CHOL

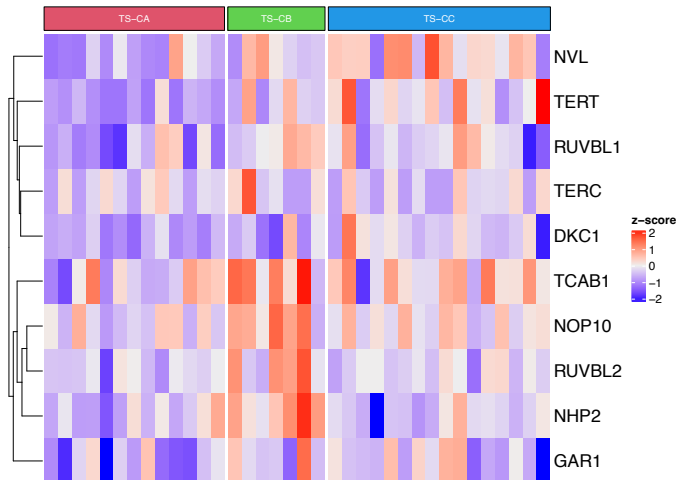

TCGA-COAD

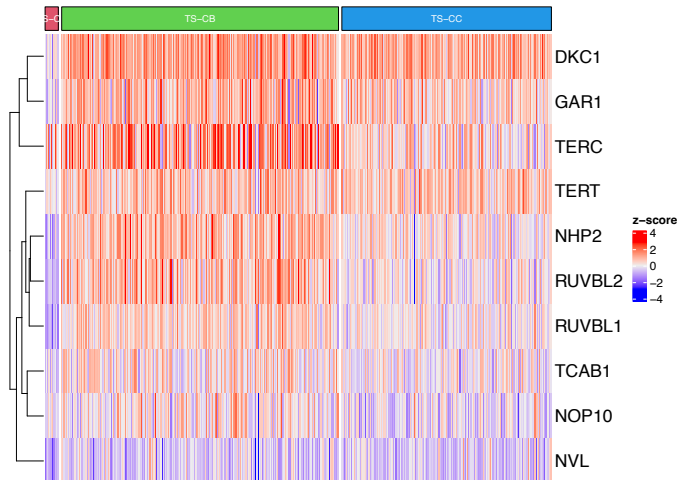

TCGA-DLBC

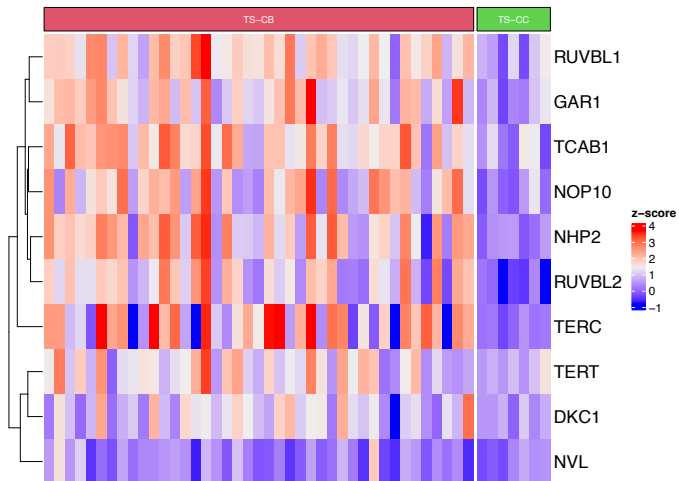

TCGA-ESCA

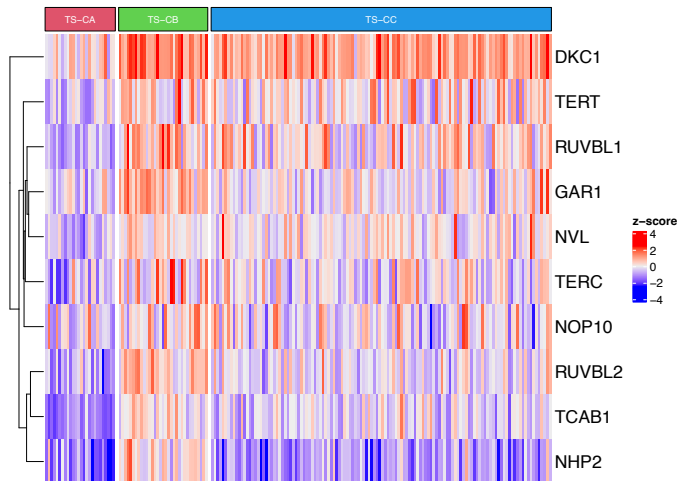

TCGA-GBM

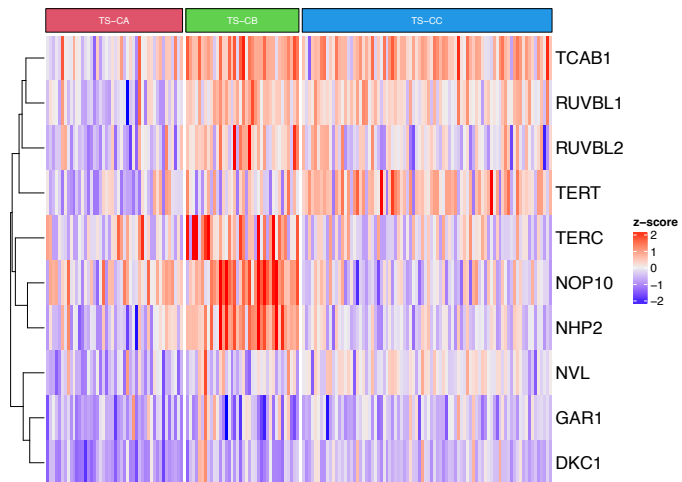

TCGA-HNSC

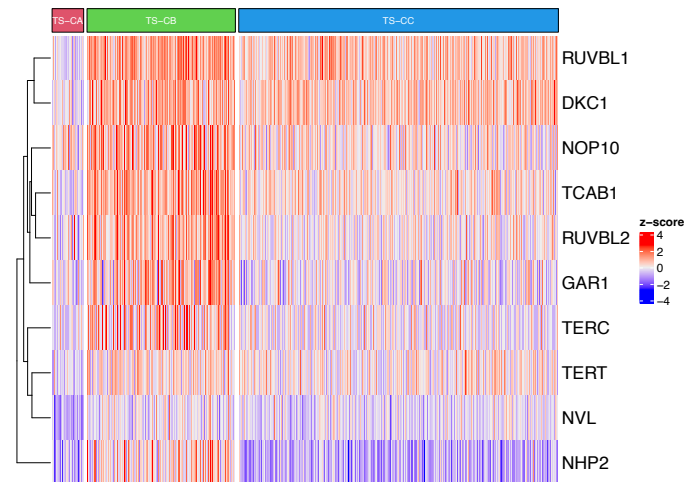

TCGA-KICH

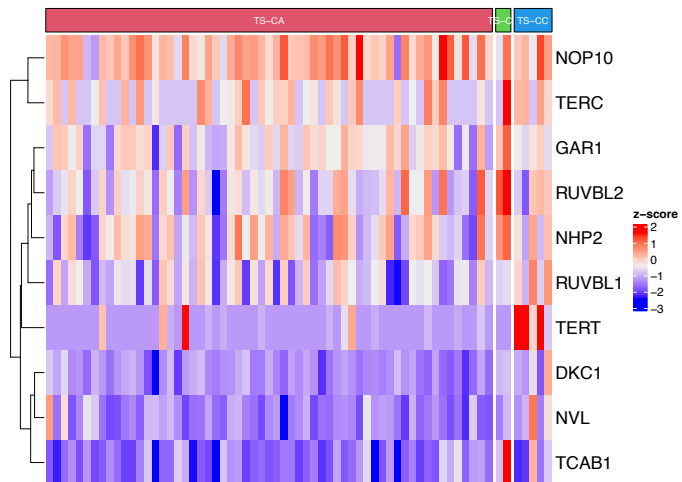

TCGA-KIRC

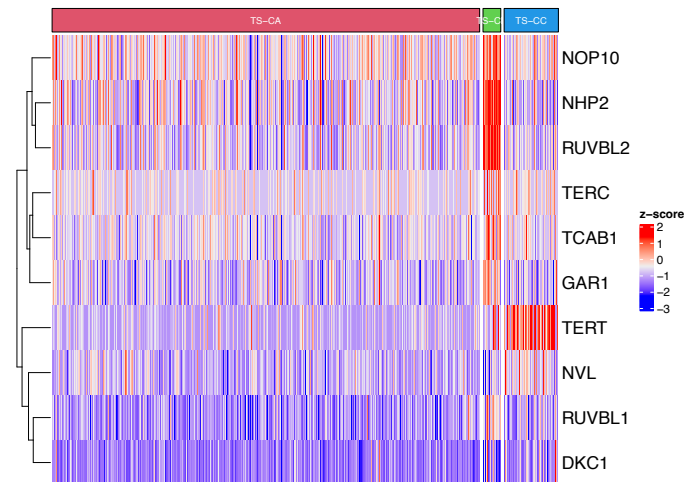

TCGA-KIRP

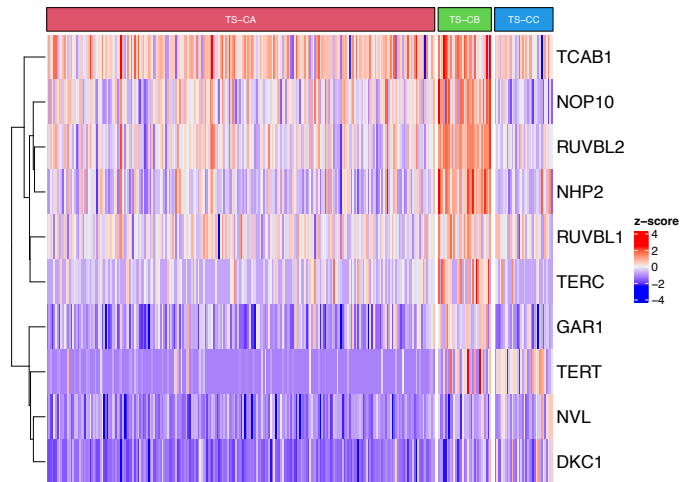

TCGA-LAML

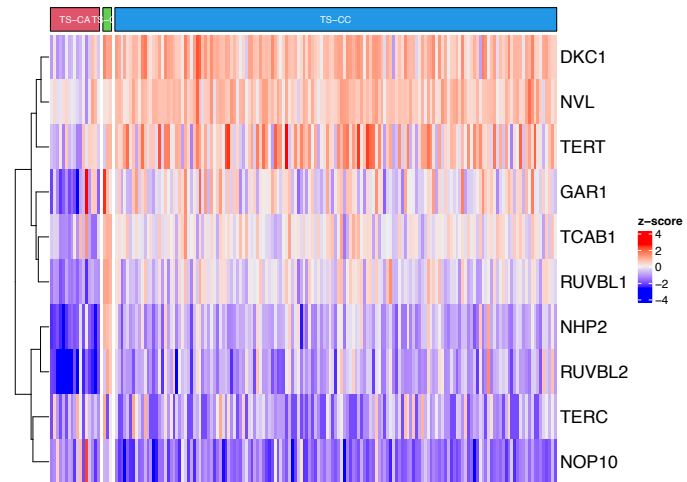

TCGA-LGG

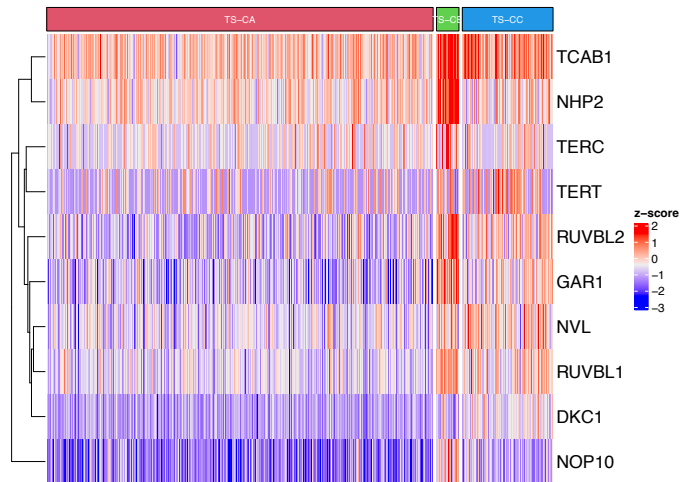

TCGA-LIHC

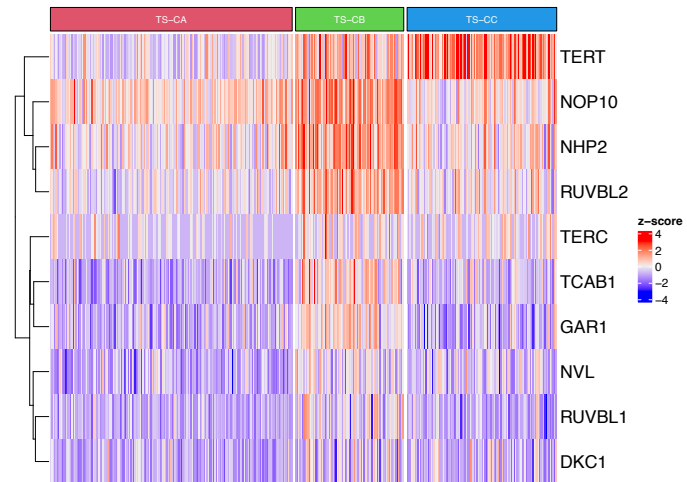

TCGA-LUAD

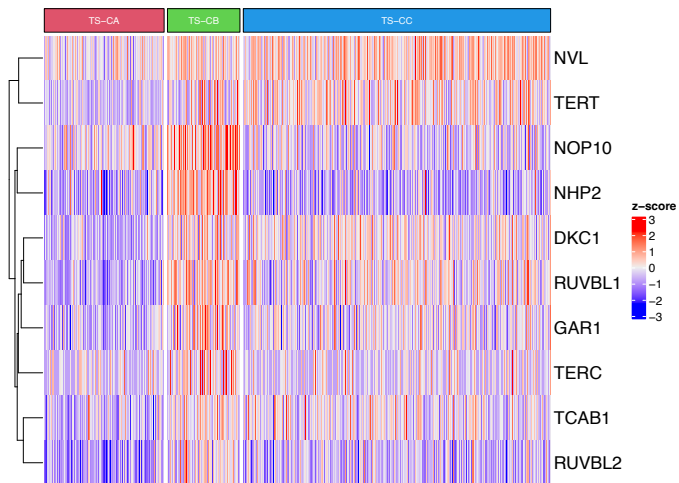

TCGA-LUSC

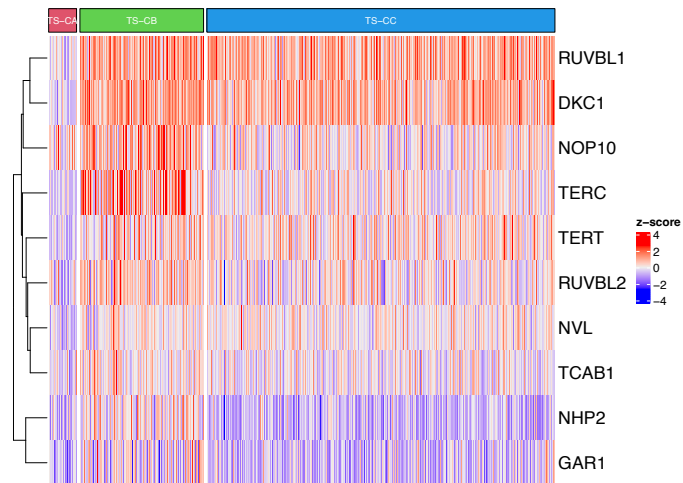

TCGA-MESO

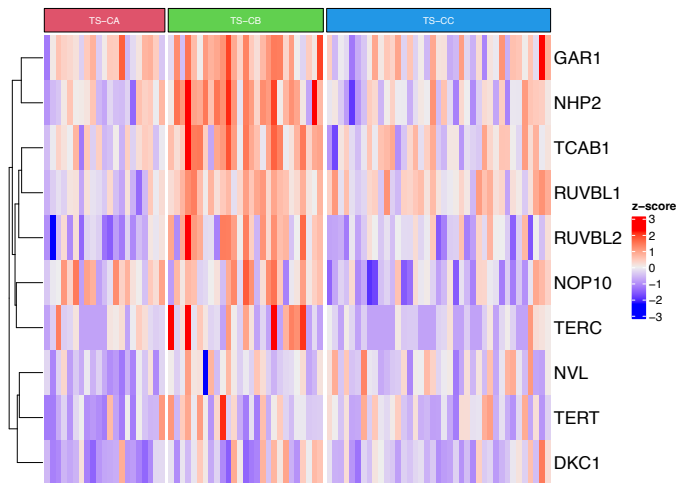

TCGA-OV

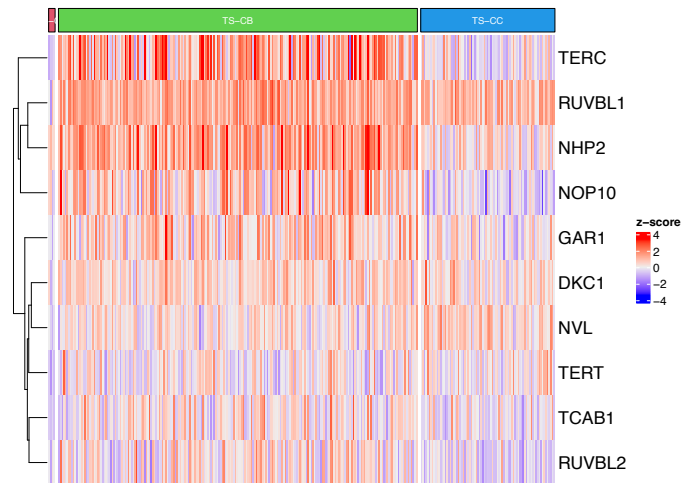

TCGA-PAAD

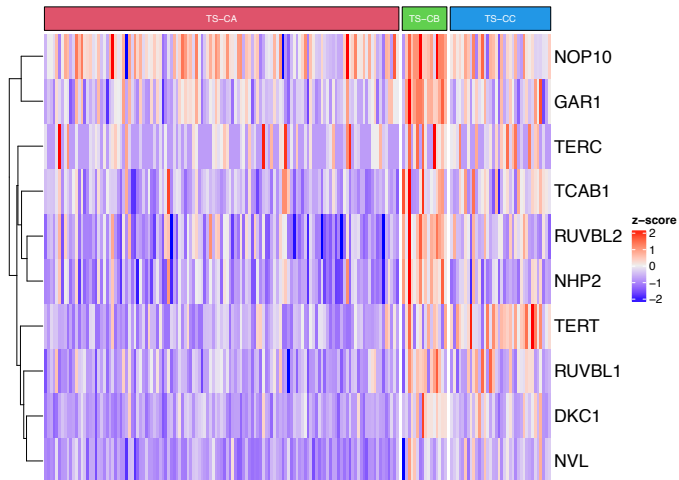

TCGA-PCPG

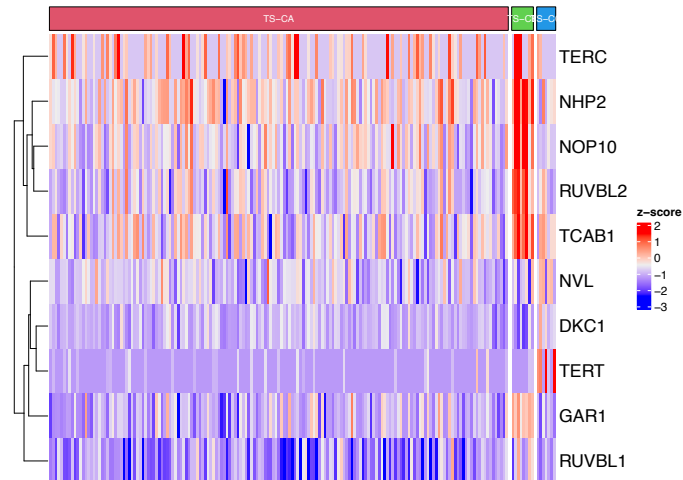

TCGA-PRAD

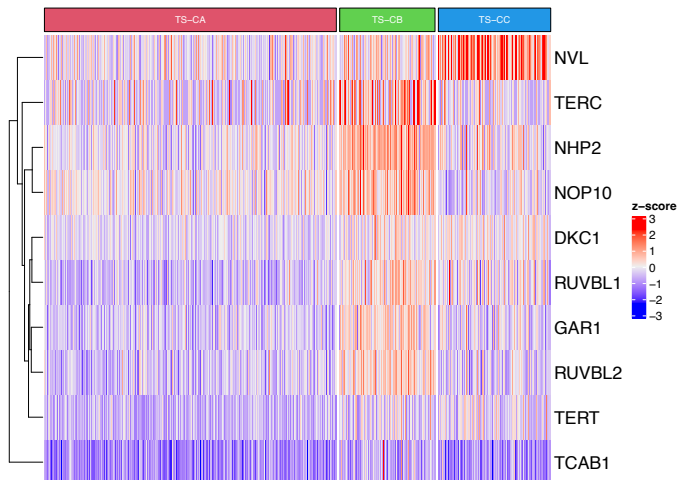

TCGA-READ

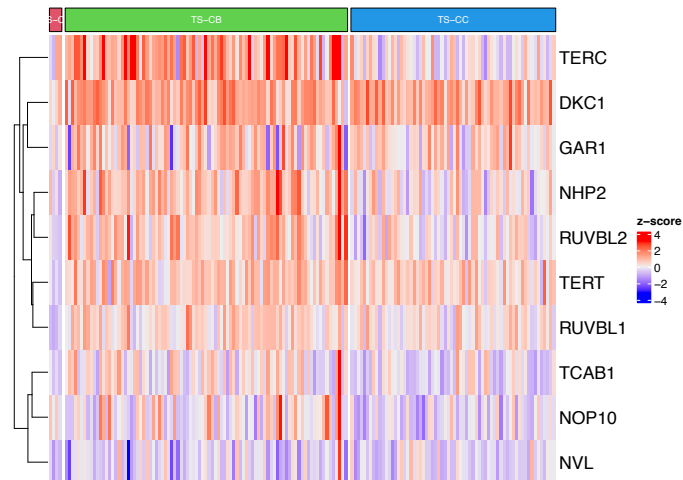

TCGA-SARC

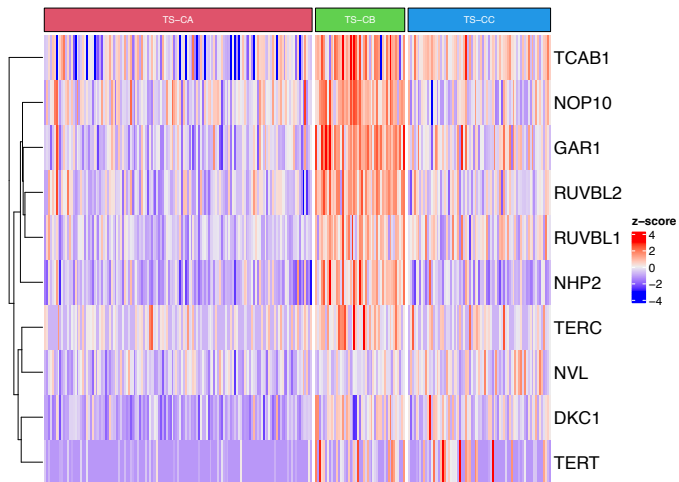

TCGA-SKCM

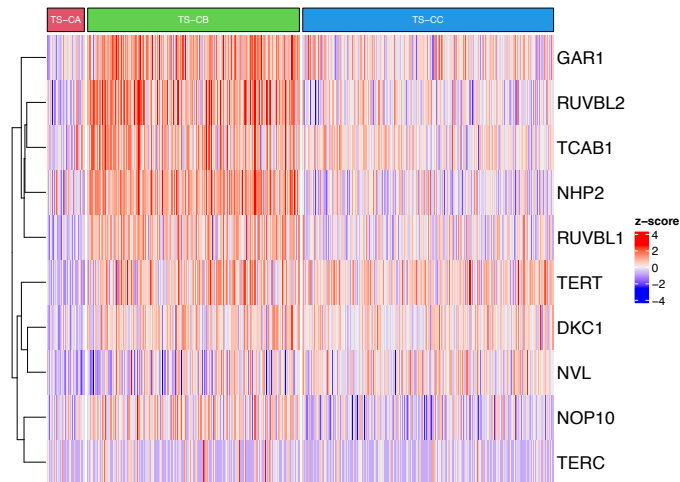

TCGA-STAD

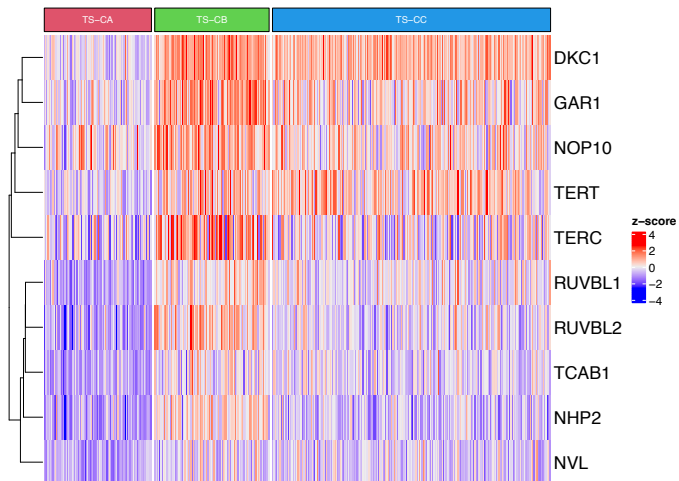

TCGA-TGCT

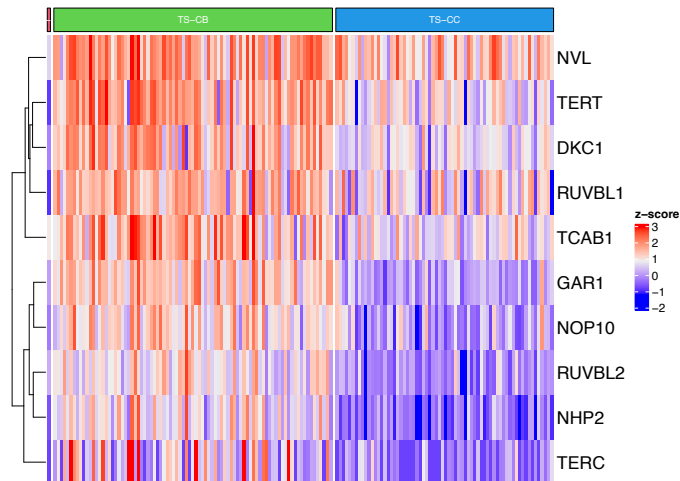



TCGA-THCA

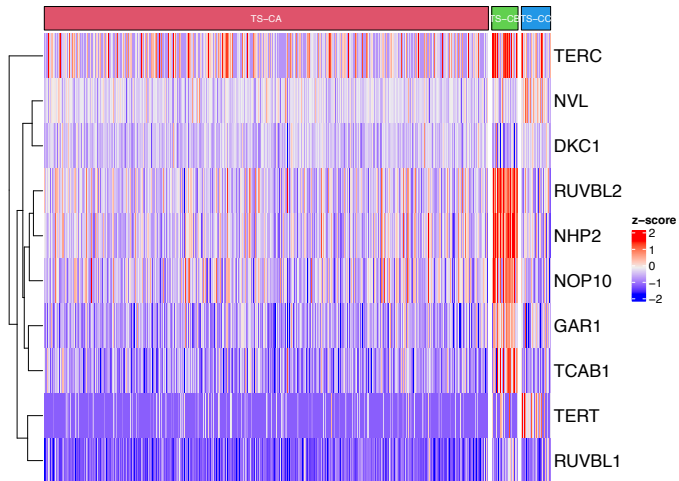

TCGA-THYM

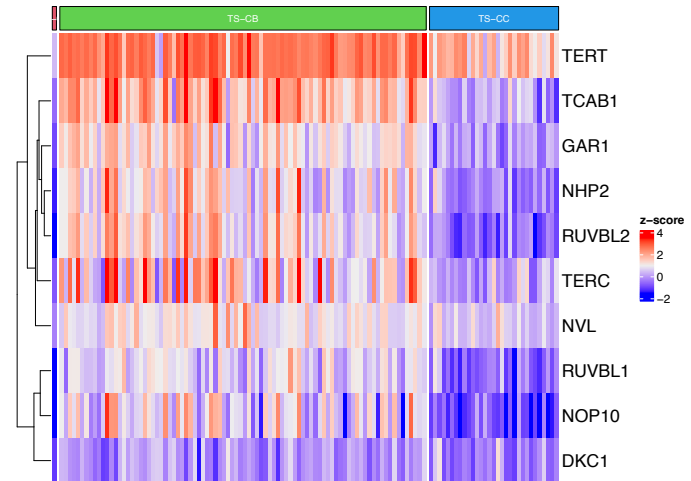

TCGA-UCEC

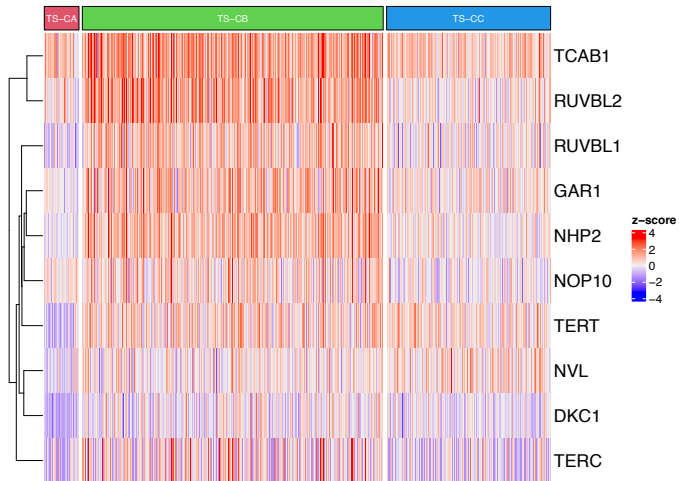

TCGA-UCS

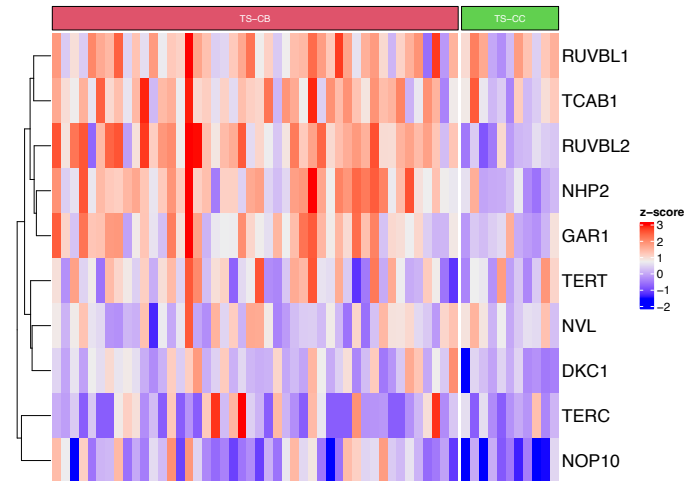

## TCGA-UVM

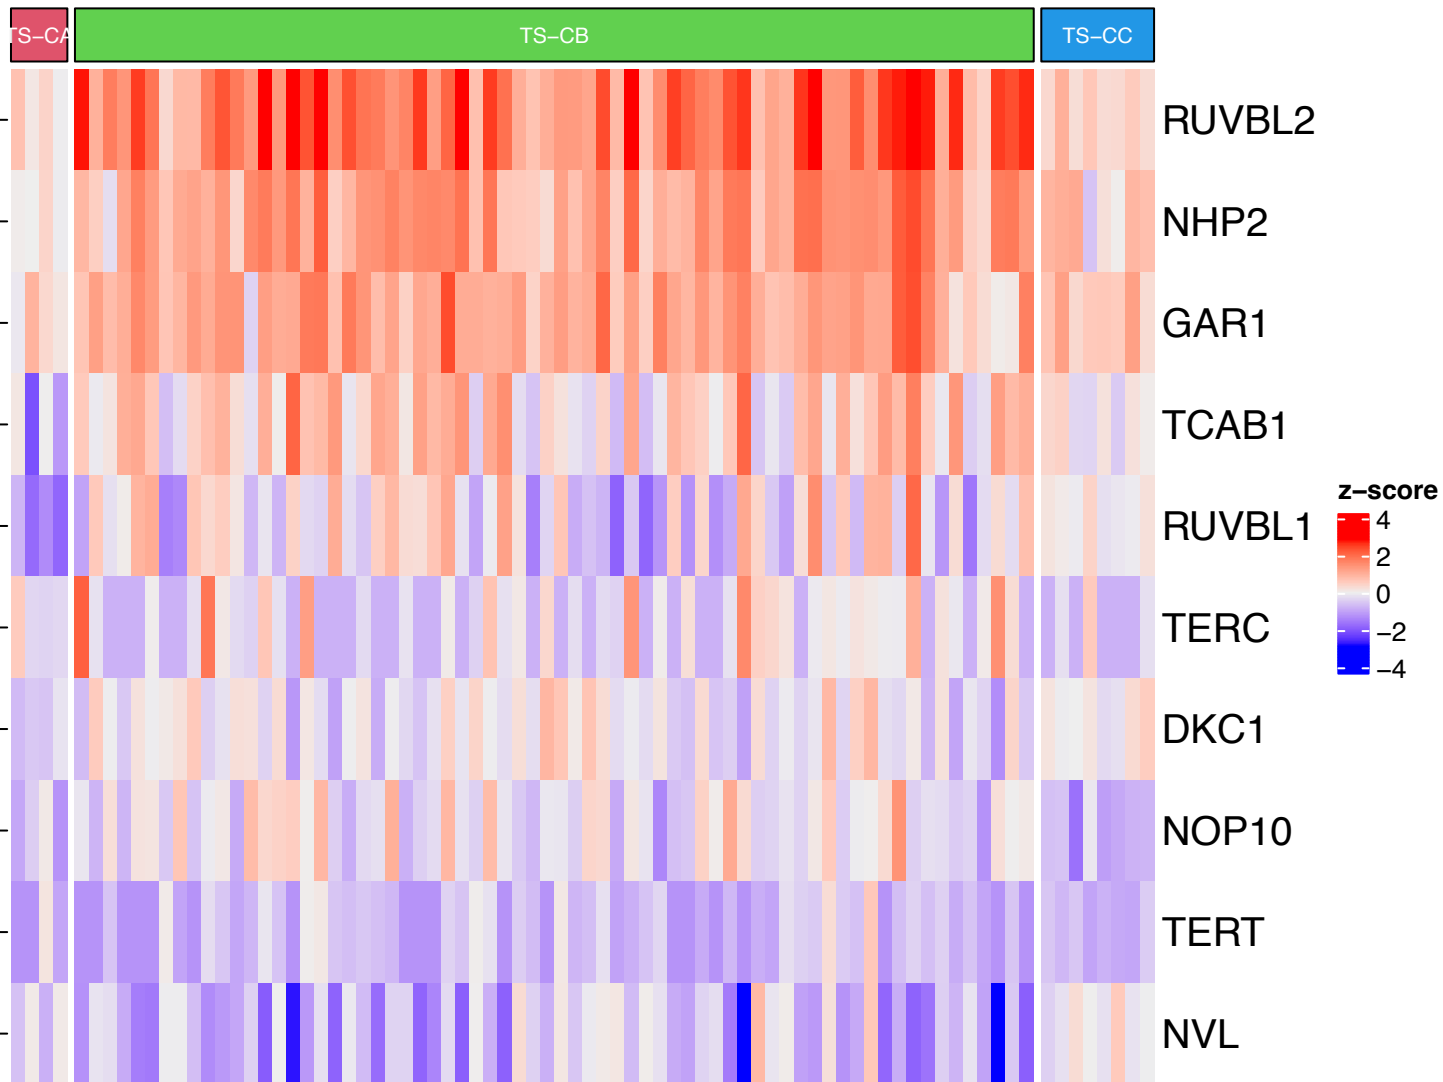

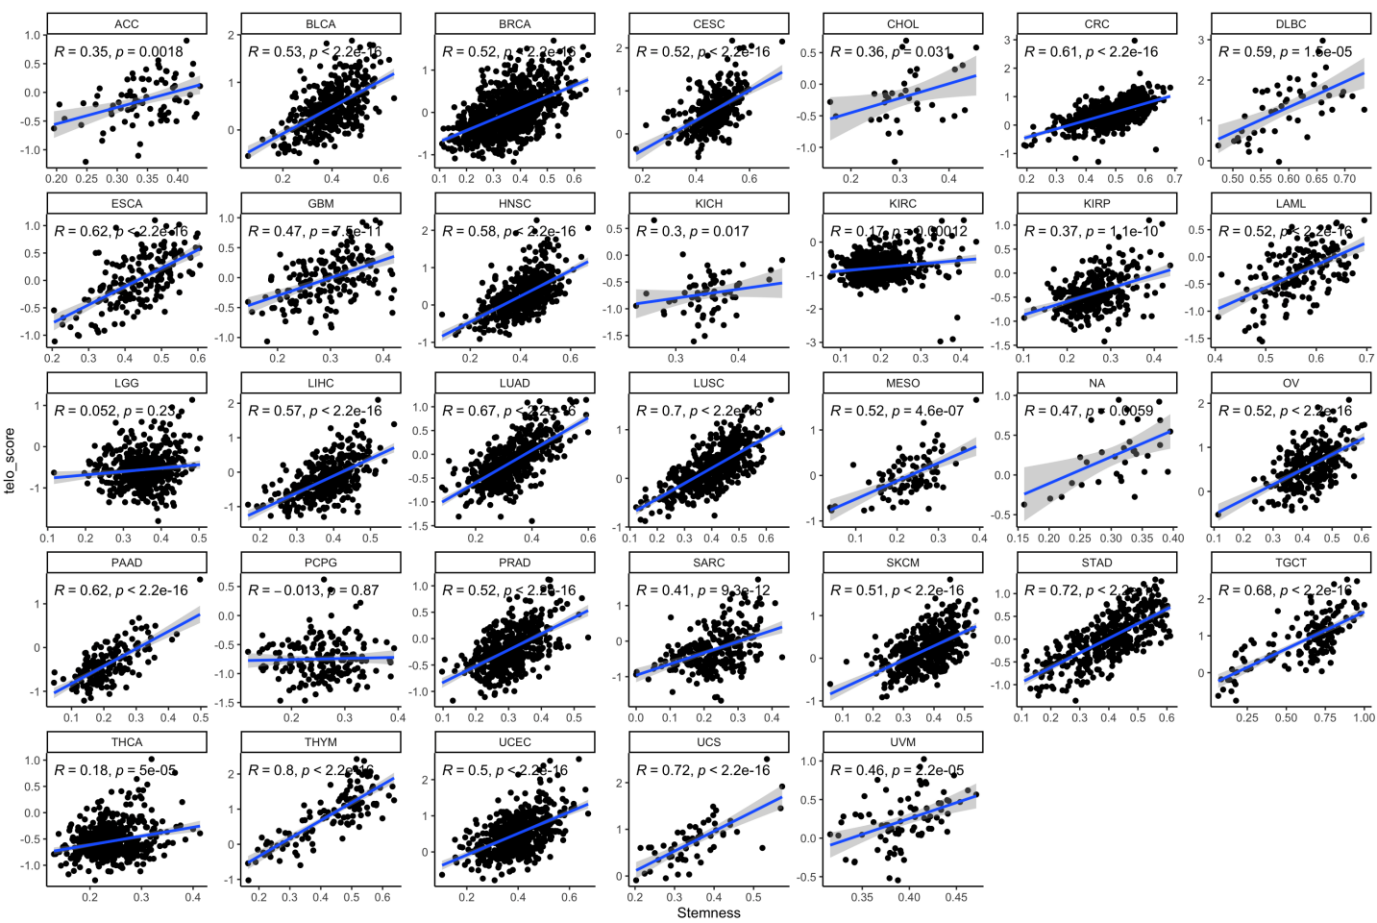

**Figure S2. Correlation between telomerase score (TS) and stemness in each cancer across 33 cancer types.** Positive correlation between TS and stemness was observed 31 of 33 cancer types except PCPG and LGG.

**Figure S3. The correlation between telomerase score (TS) and proliferation marker MKI67 level in each cancer type.**

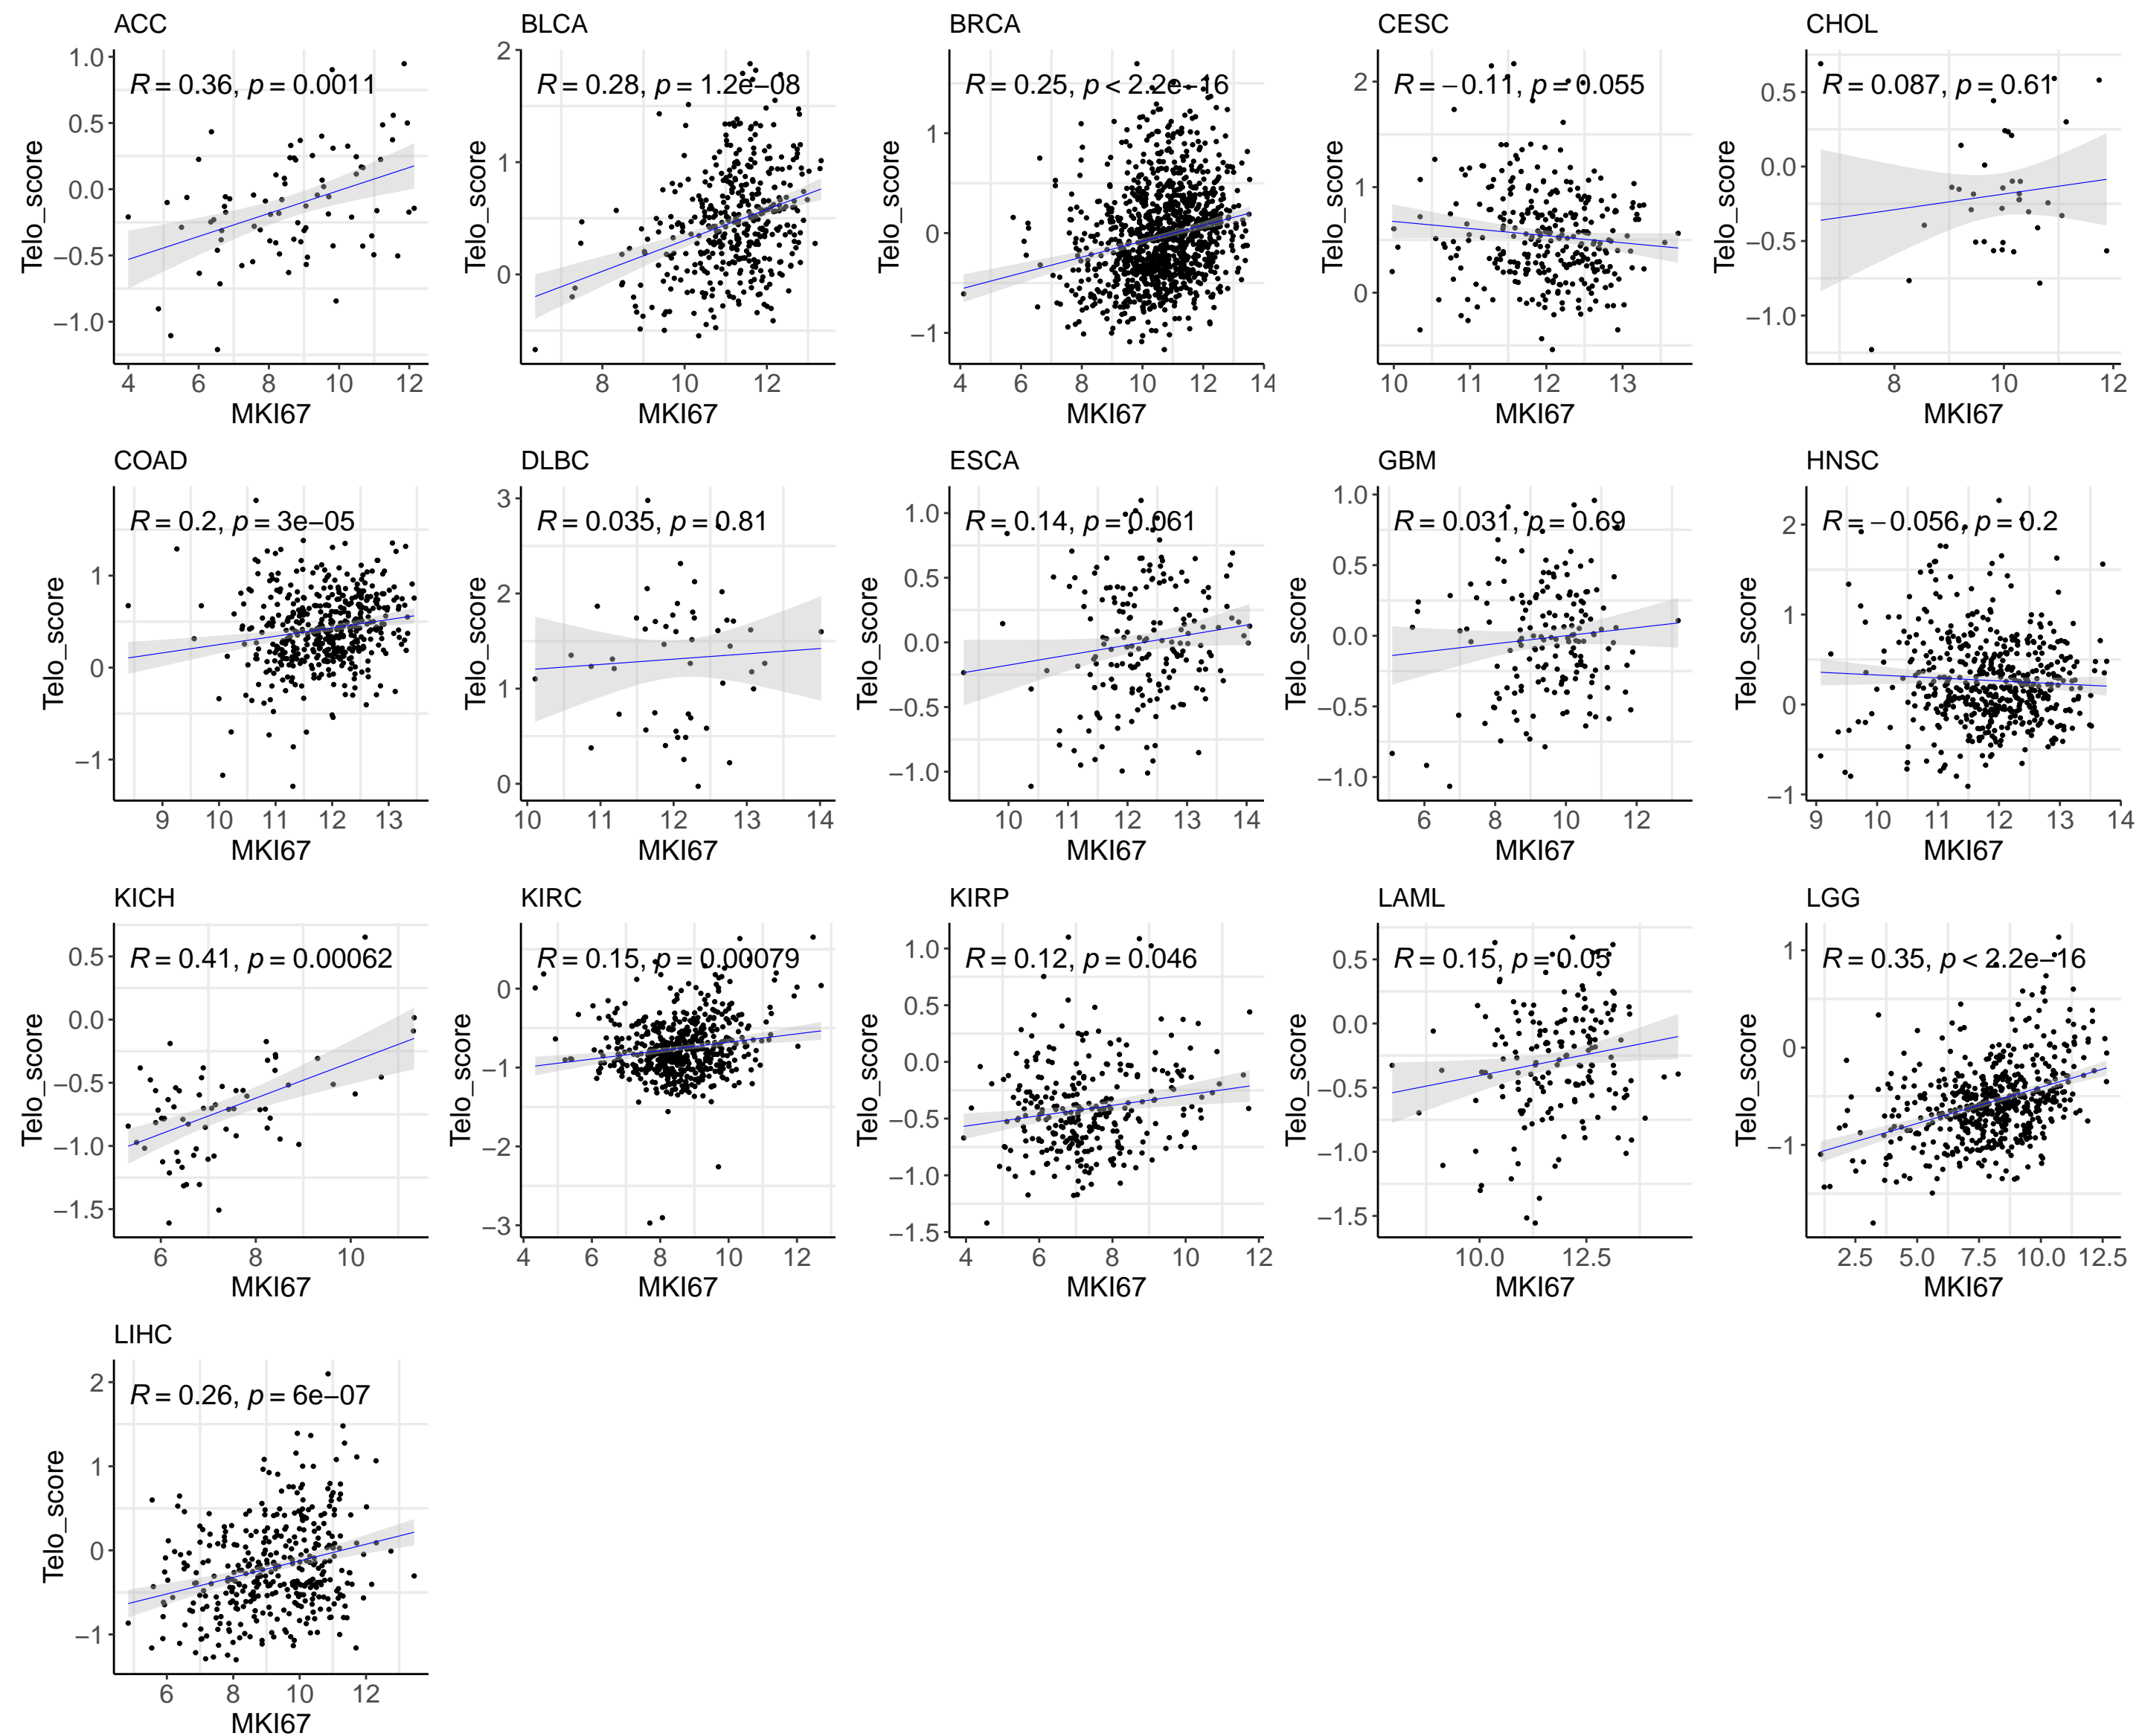

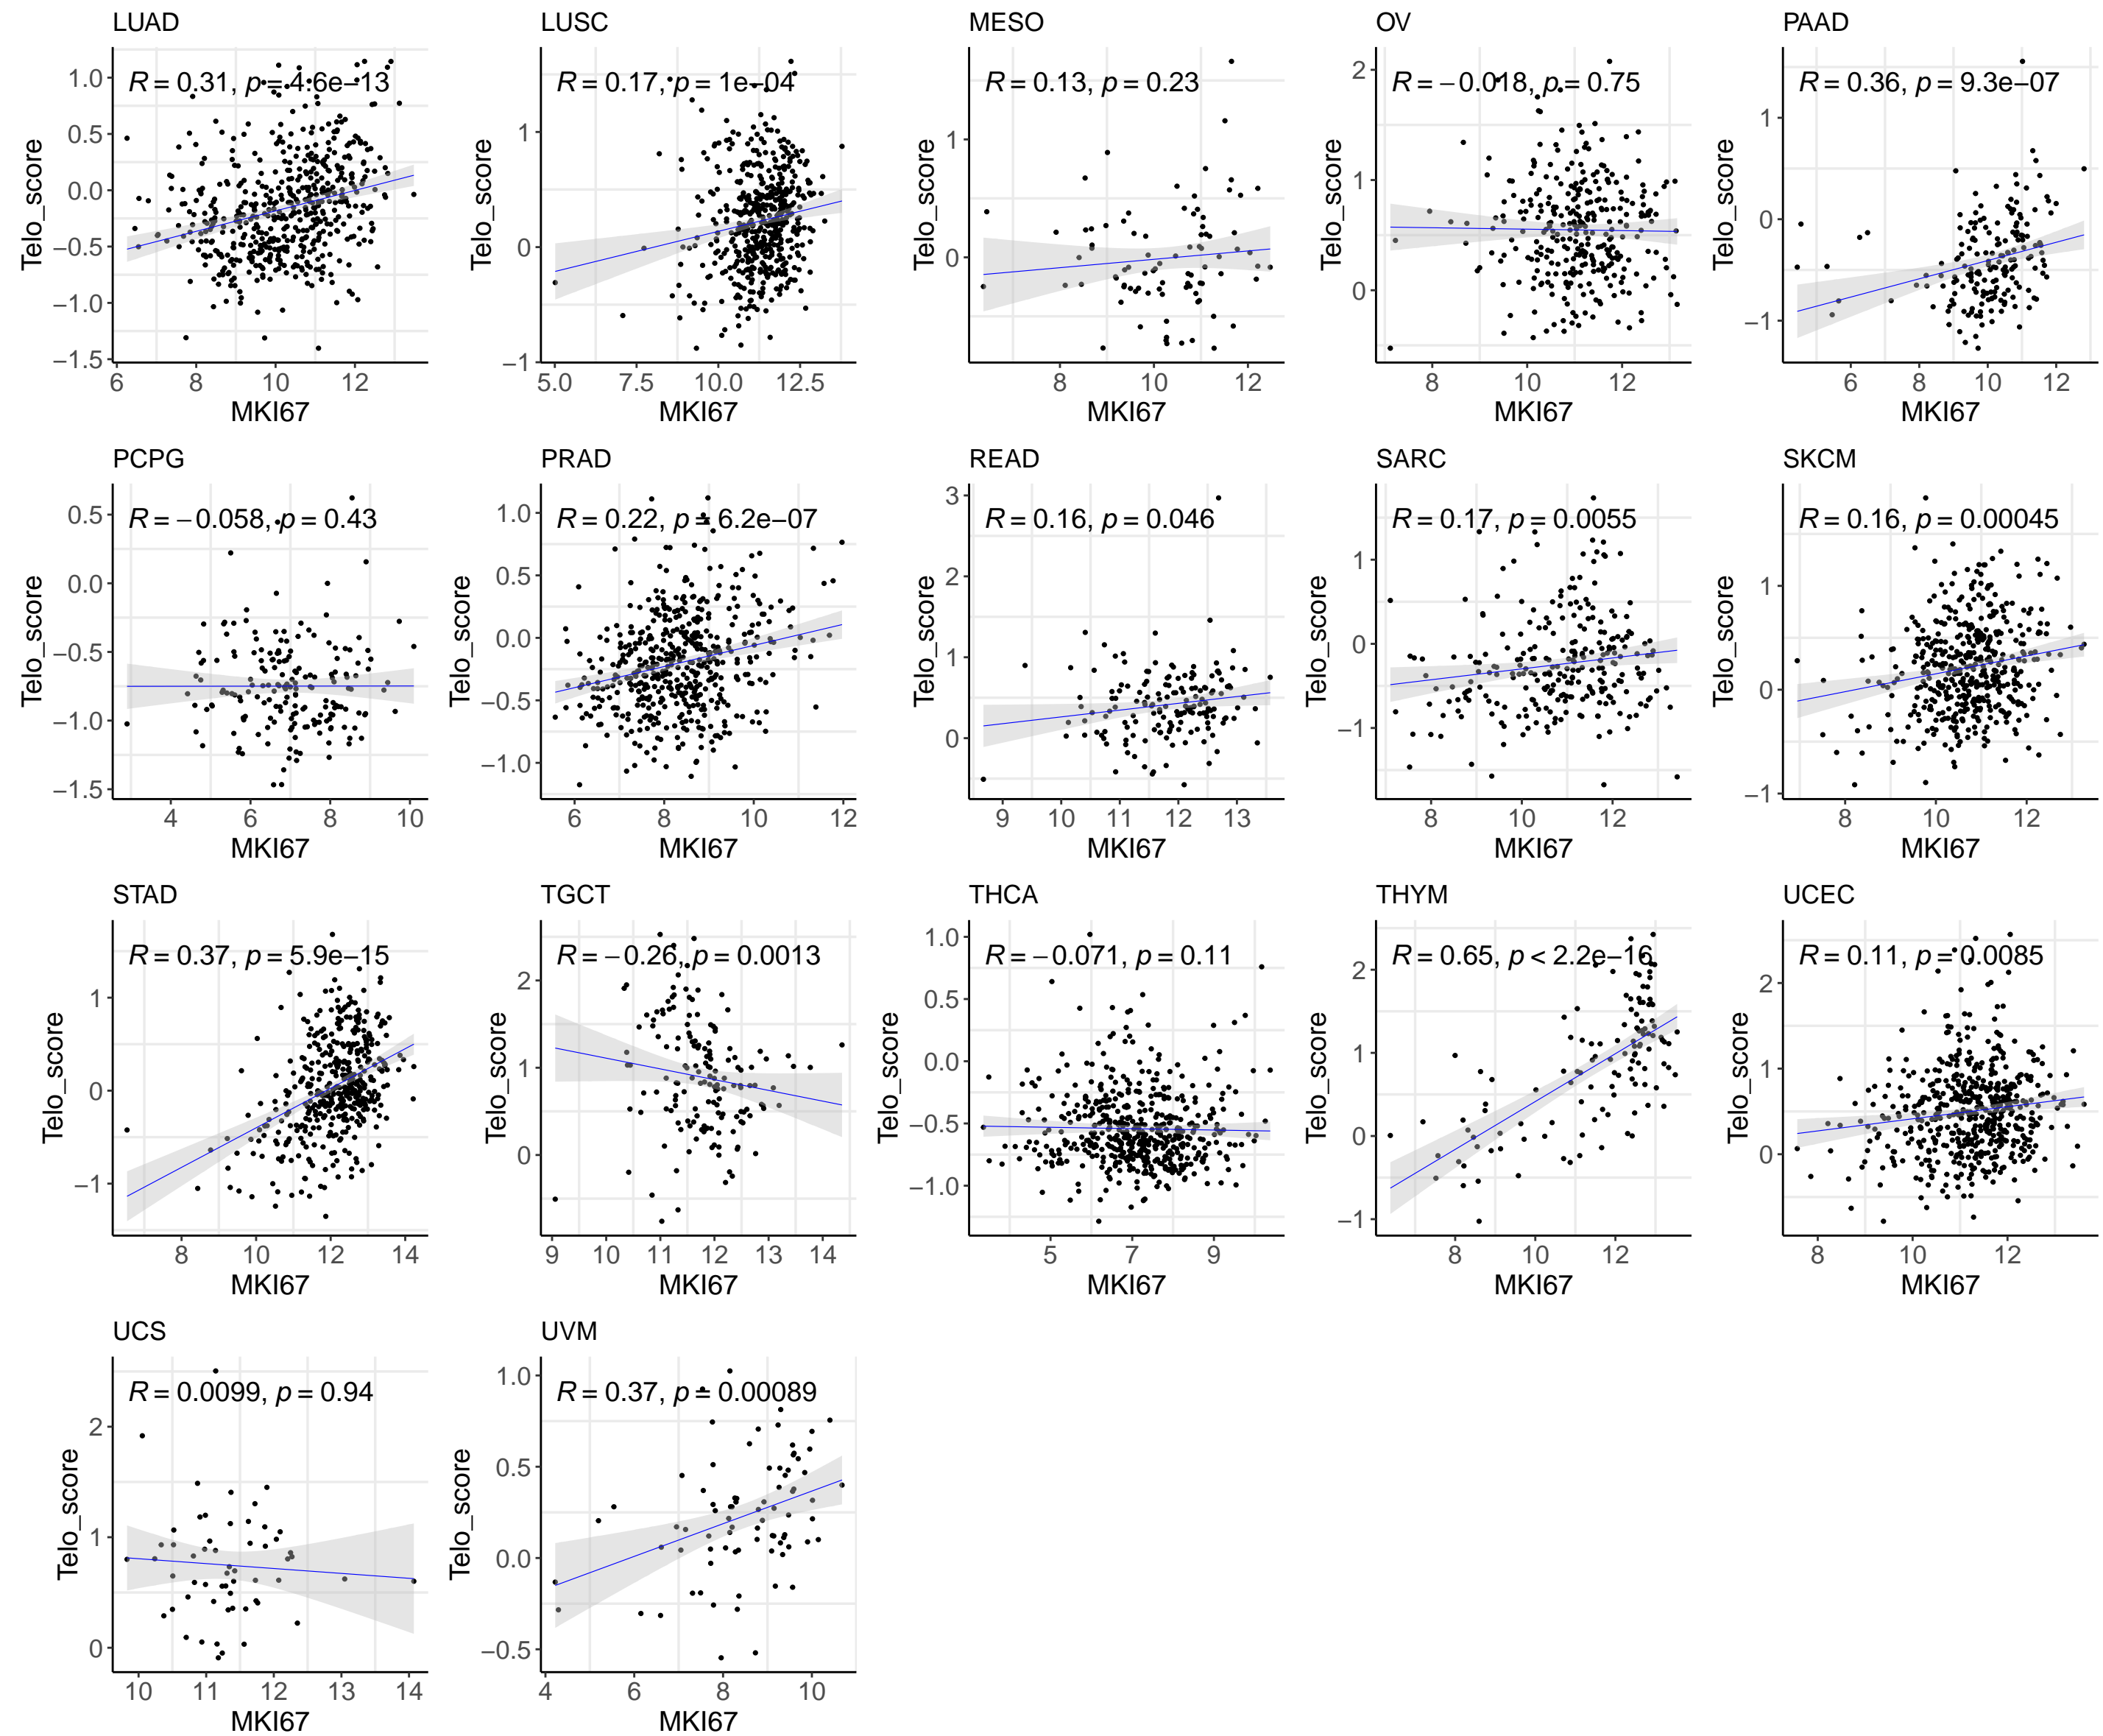

**Figure S4. The correlation between telomerase score (TS) and EMT score in each type of cancer**

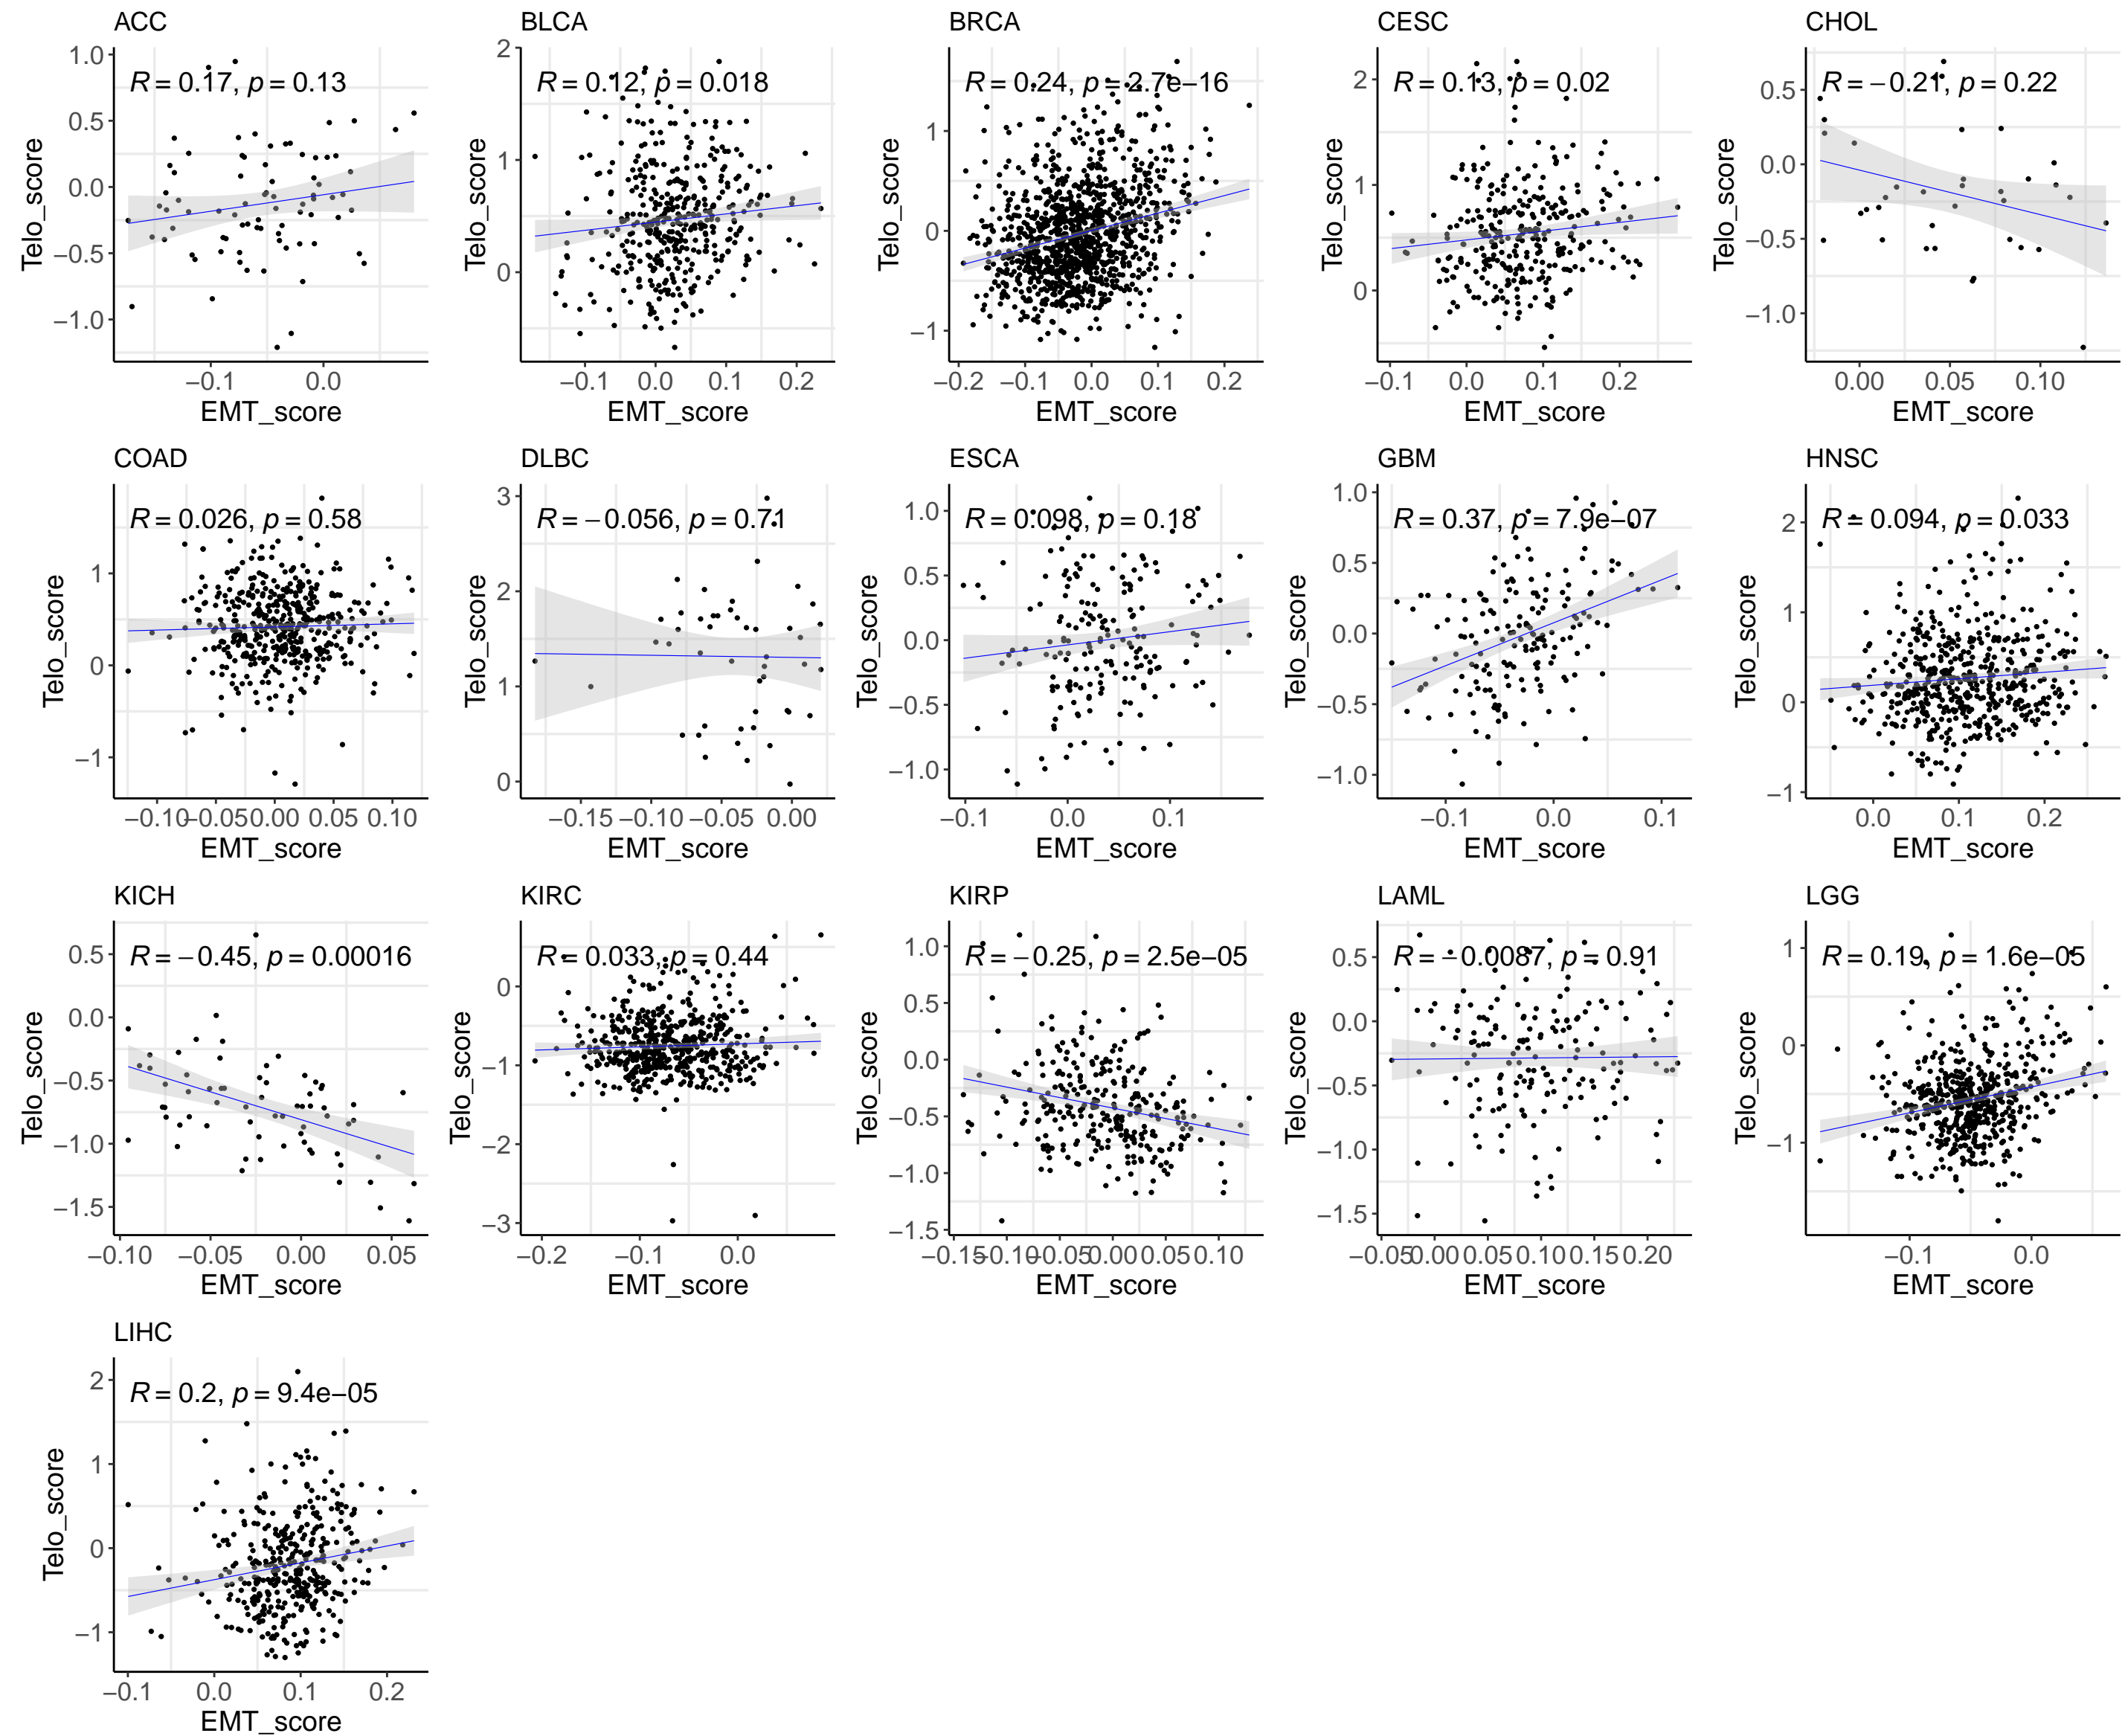

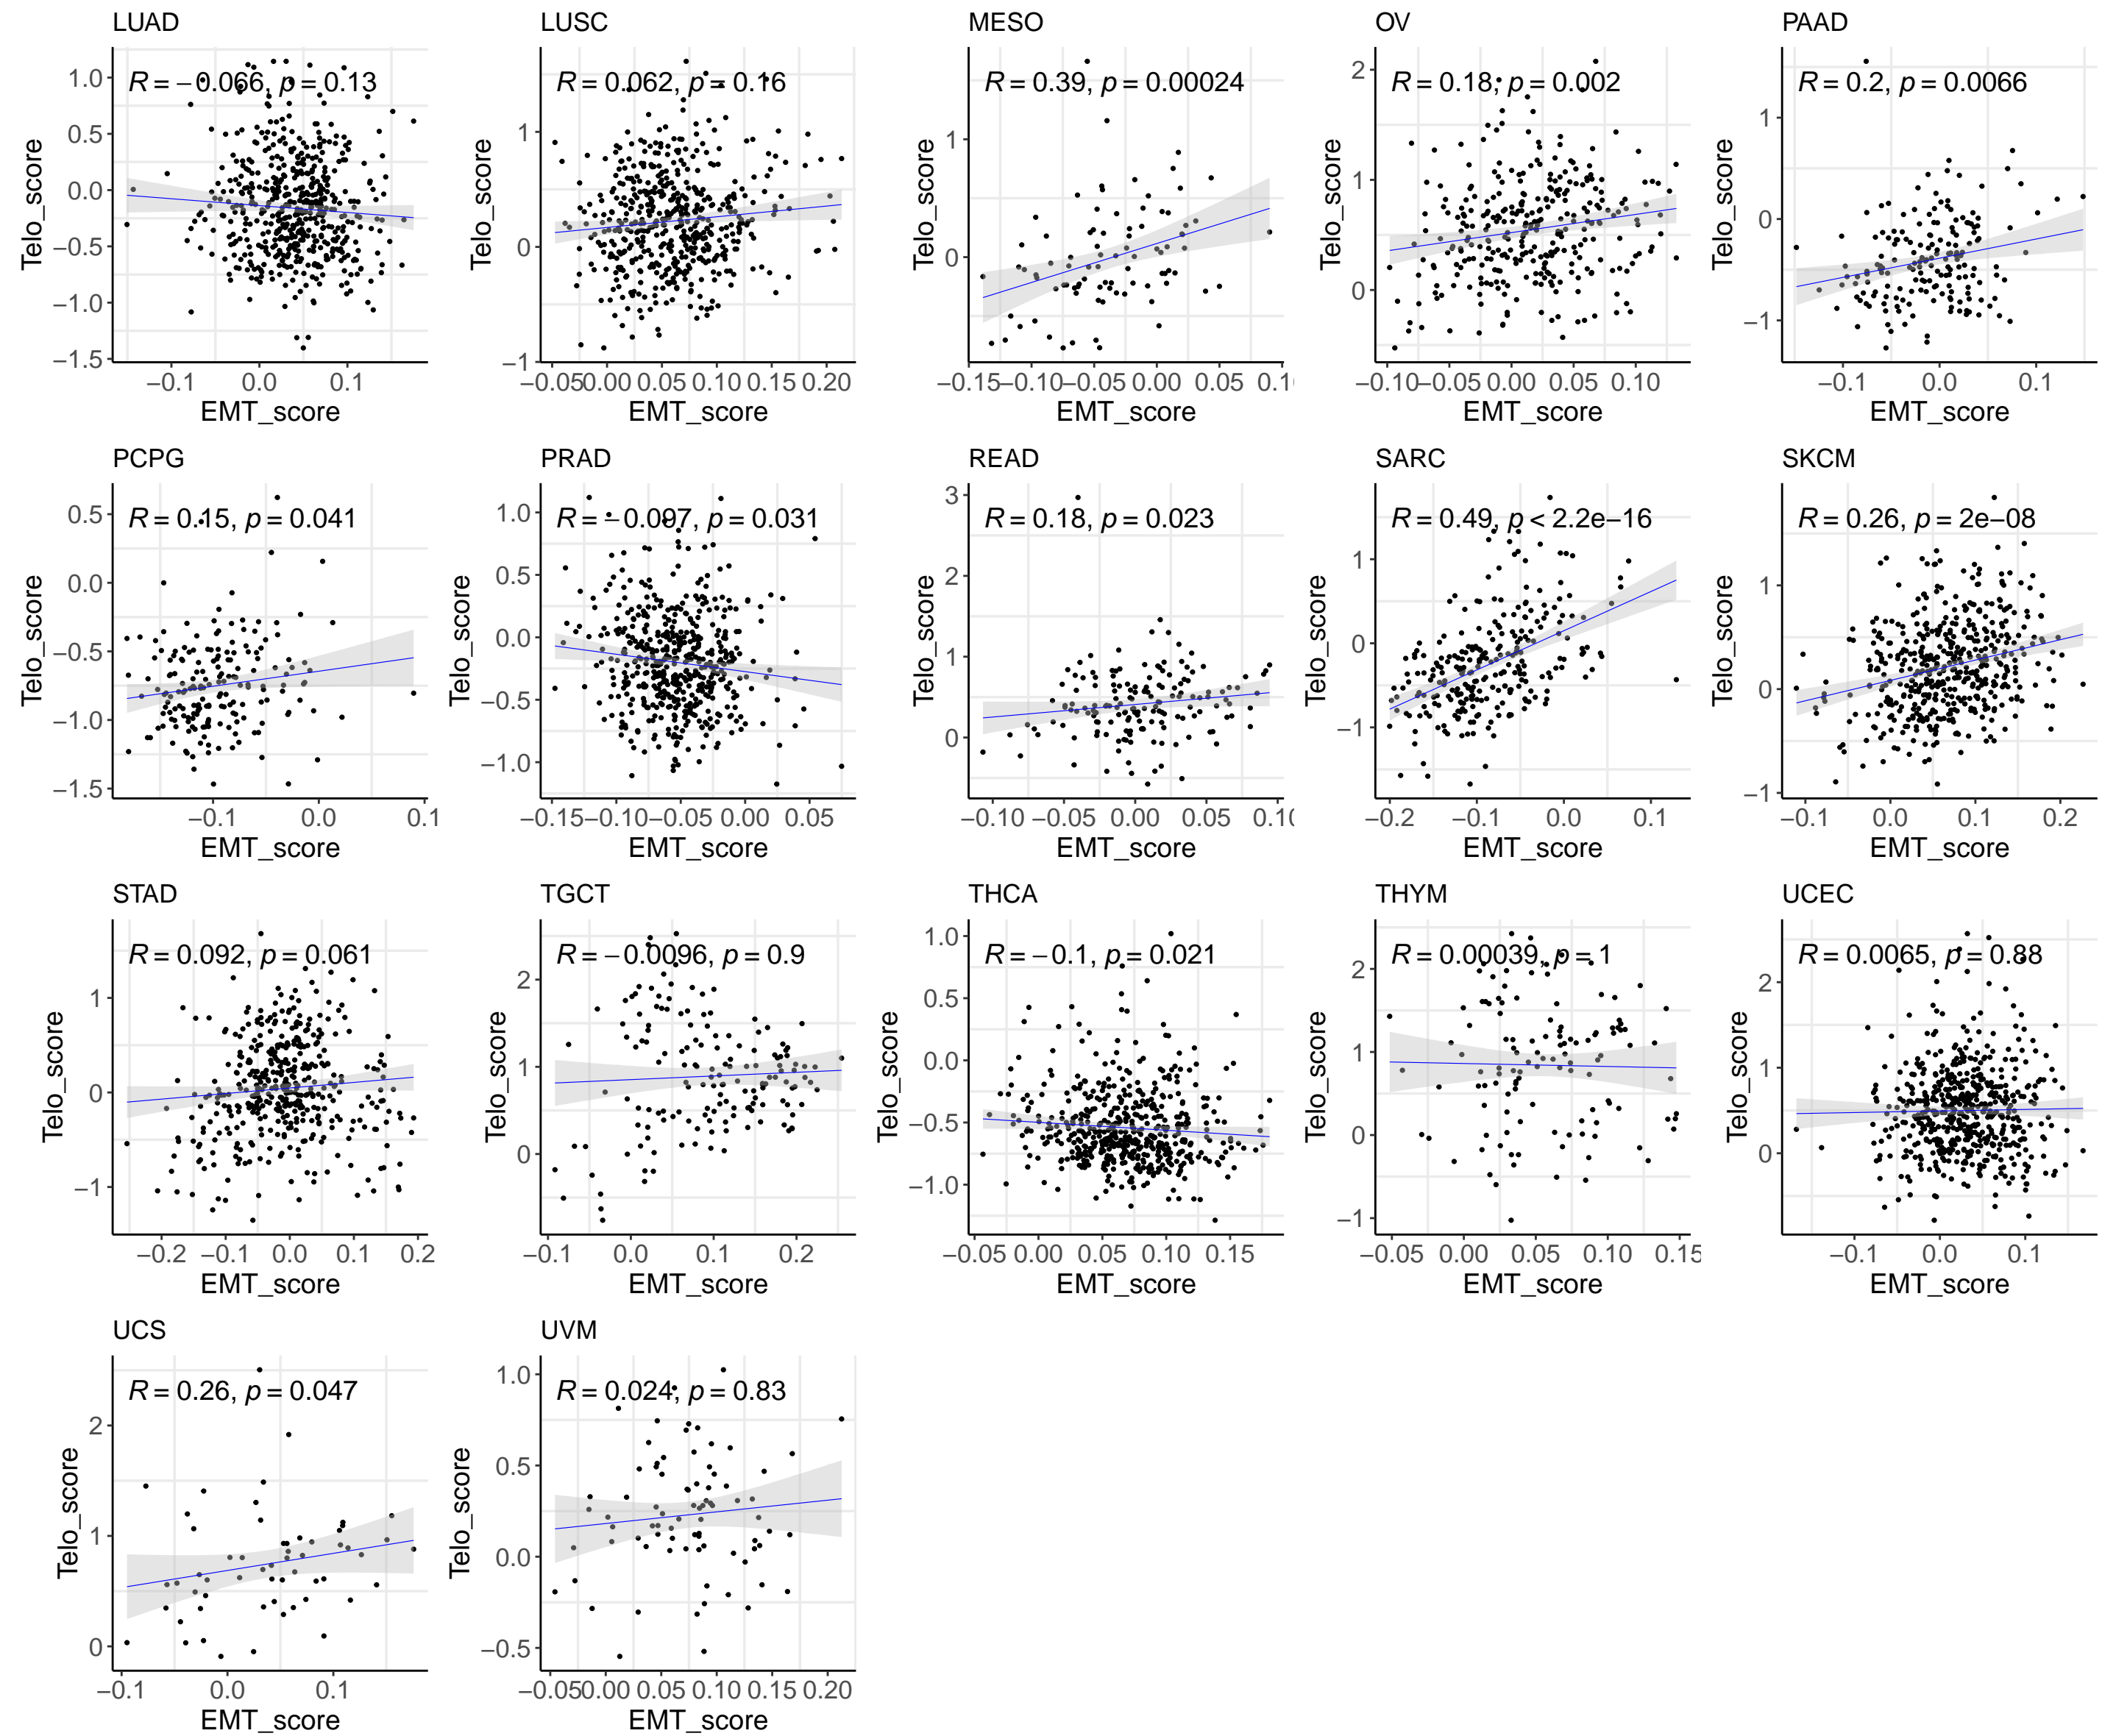

**Figure S5. Correlation between gene copy numbers and expression of ten telomerase components in pan-cancers**

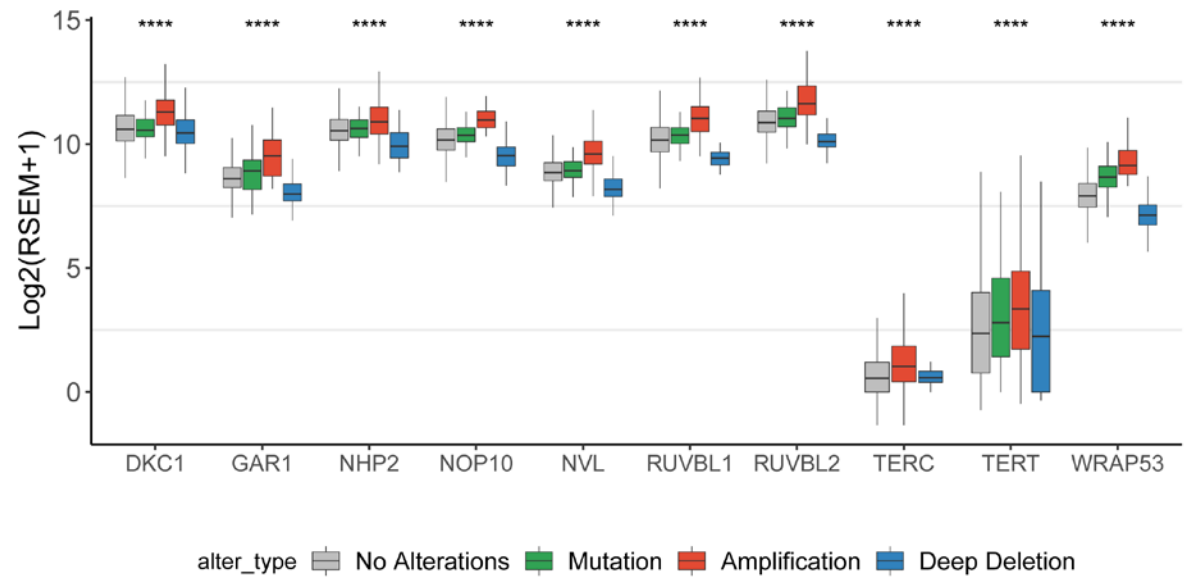



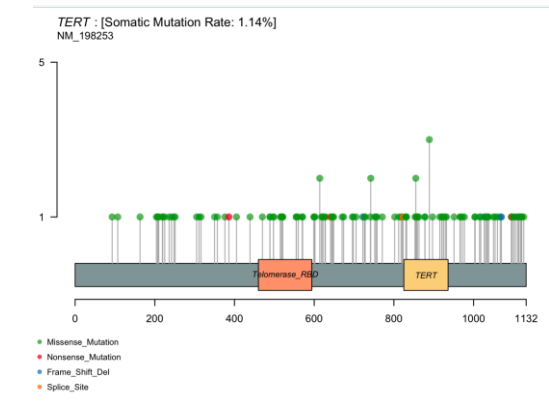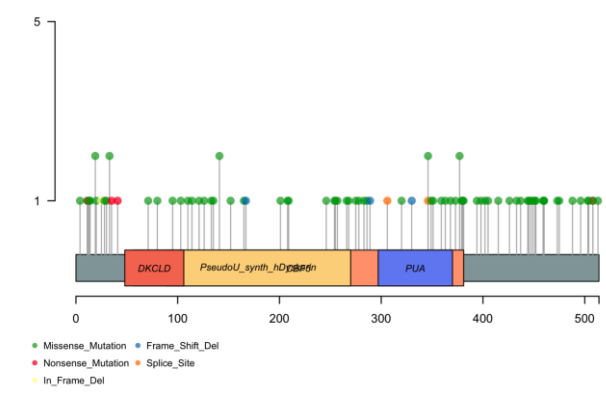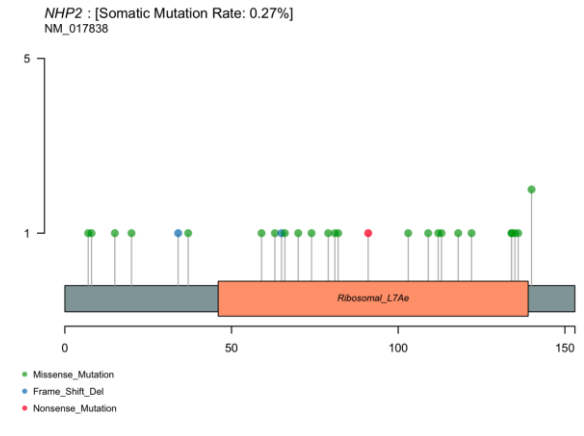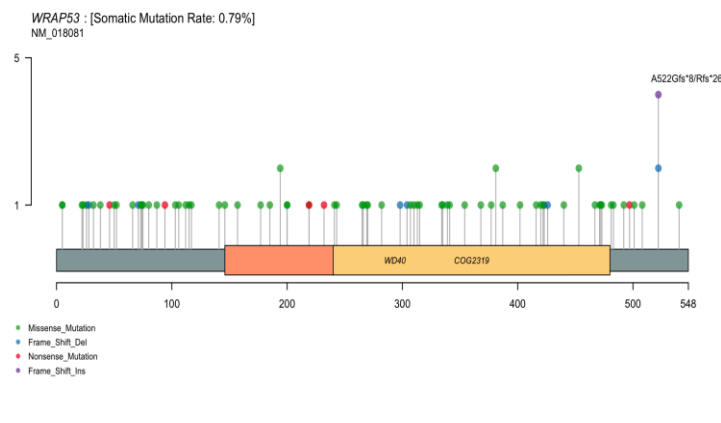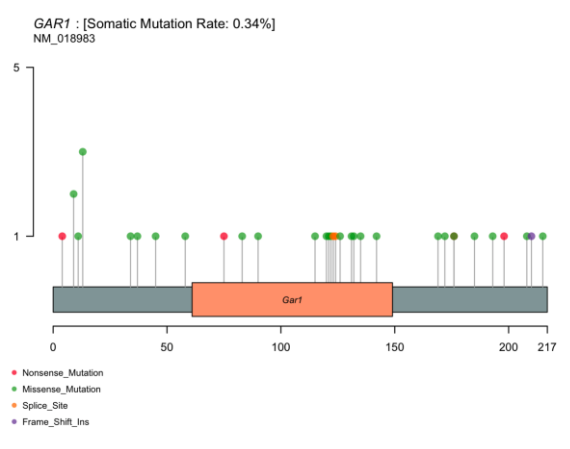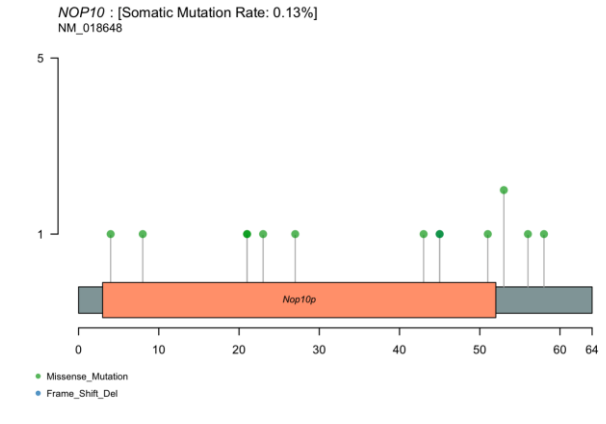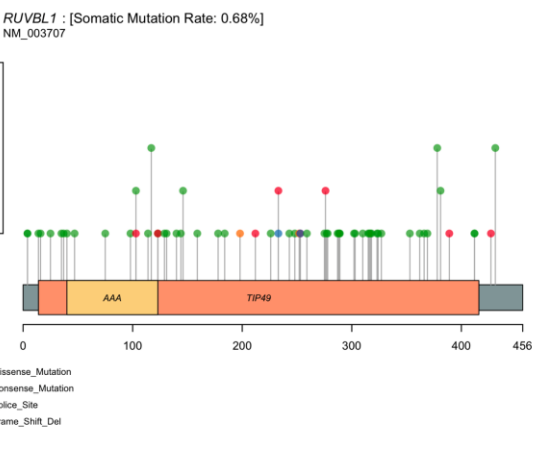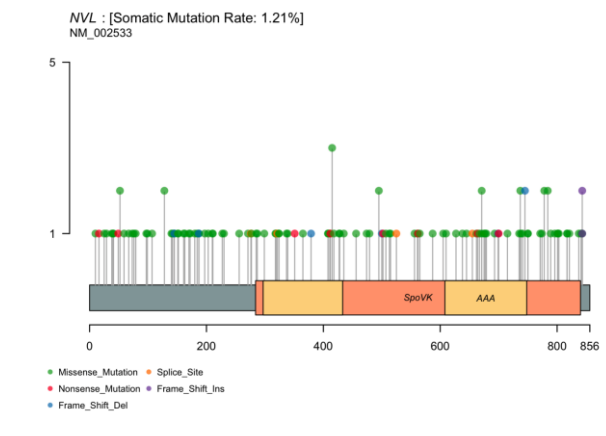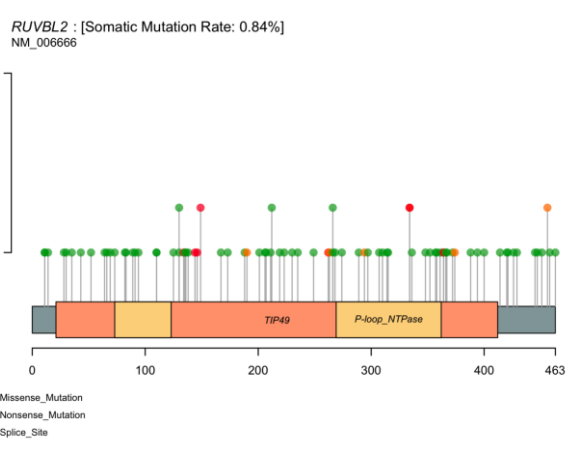

**Figure S6. Mutational landscapes of 9 telomerase Components.**
